# Supplementary material for: Soil characterization using patterns of magnetic susceptibility versus effective radium concentration
Source: Copernicus journal article supplement (doi:10.5194/nhess-11-2285-2011), 2011-08-23
Supplement: Supplementary file 1 [file nhess-11-2285-2011-supplement.pdf]

Dear Reader,

Thank you very much for choosing the supplementary material. Unfortunately, a mistake occurred during the production process of this paper and the link was erroneously inserted. Therefore, no supplementary material is available.

We are sorry for any inconvenience this may have caused,

Copernicus Publications

**Copernicus Publications**

Bahnhofsallee 1e  
37081 Göttingen  
Germany

Martin Rasmussen (Managing Director)  
Nadine Deisel (Head of Production/Promotion)

**Contact**

publications@copernicus.org  
<http://publications.copernicus.org>  
Phone +49-551-900339-50  
Fax +49-551-900339-70

**Legal Body**

Copernicus Gesellschaft mbH  
Based in Göttingen  
Registered in HRB 131 298  
County Court Göttingen  
Tax Office FA Göttingen  
USt-IdNr. DE216566440
